# Supplementary material
Source: PubMed Central journal article supplement (PMC6335107)
Supplement: 10-1055-s-0038-1676971-s180156ra.pdf [file 10-1055-s-0038-1676971-s180156ra.pdf]

**Supplemental Table S1** Comparison of portal users, study unit, and hospital demographics

| Variable                                | Portal users,<br><i>N</i> = 146 | Study units,<br><i>n</i> = 161,377 | Entire hospital,<br><i>n</i> = 3,350,773 |
|-----------------------------------------|---------------------------------|------------------------------------|------------------------------------------|
| Age (mean)                              | 56                              | 64                                 | 48                                       |
| Female sex (%)                          | 40.4                            | 40.3                               | 56.4                                     |
| Race (%)                                |                                 |                                    |                                          |
| Asian or Pacific Islander               | 2.8                             | 3.1                                | 2.2                                      |
| Black or African American               | 16.0                            | 9.3                                | 9.8                                      |
| Other or Multirace                      | 22.9                            | 29.1                               | 40.9                                     |
| White                                   | 58.3                            | 58.3                               | 47.1                                     |
| Hispanic, Latino, or Spanish origin (%) | 22.1                            | 18.0                               | 23.5                                     |

Note: Categorical variables reported as *n* (%), and continuous variables reported as mean  $\pm$  SD. Percentages exclude missing data. Demographics for the two study units and the entire hospital represent all inpatients hospitalized between March 2014 to May 2017.
